# Supplementary material
Source: PubMed Central journal article supplement (PMC5998980)
Supplement: fj.201700667R.sf1.pdf [file fj.201700667R.sf1.pdf]

## Supplement Figure 1

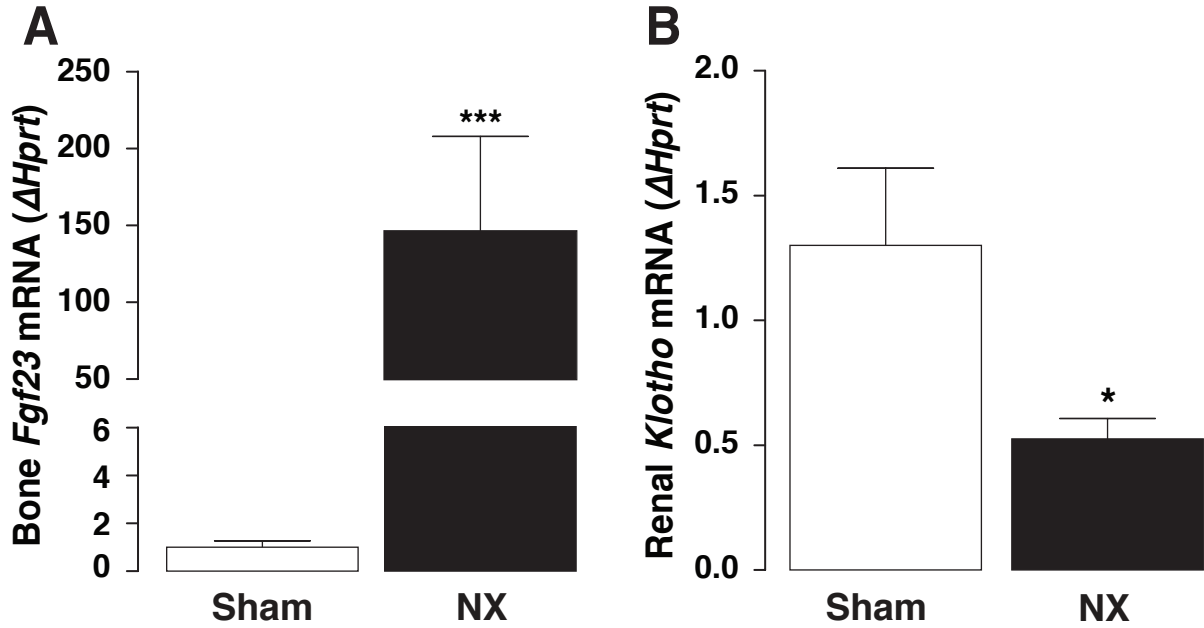

**Supplemental Figure 1:** Quantitative real-time RT-PCR. **(A)** bone *Fgf23*, and **(B)** renal *Klotho* mRNA expression in Sham and 5/6 Nx mice. Data are represented as fold change ( $\Delta$ ) relative to *Hprt*. Data are represented as mean  $\pm$  SEM (\* $p < 0.05$  and \*\*\* $p < 0.001$ ).
